# Supplementary material for: Impact of Formulation Conditions on Lipid Nanoparticle Characteristics and Functional Delivery of CRISPR RNP for Gene Knock-Out and Correction
Source: Preprints.org preprint supplement (doi:10.20944/preprints202112.0246.v1), 2021-12-14

# LNP-RNP [Citrate]

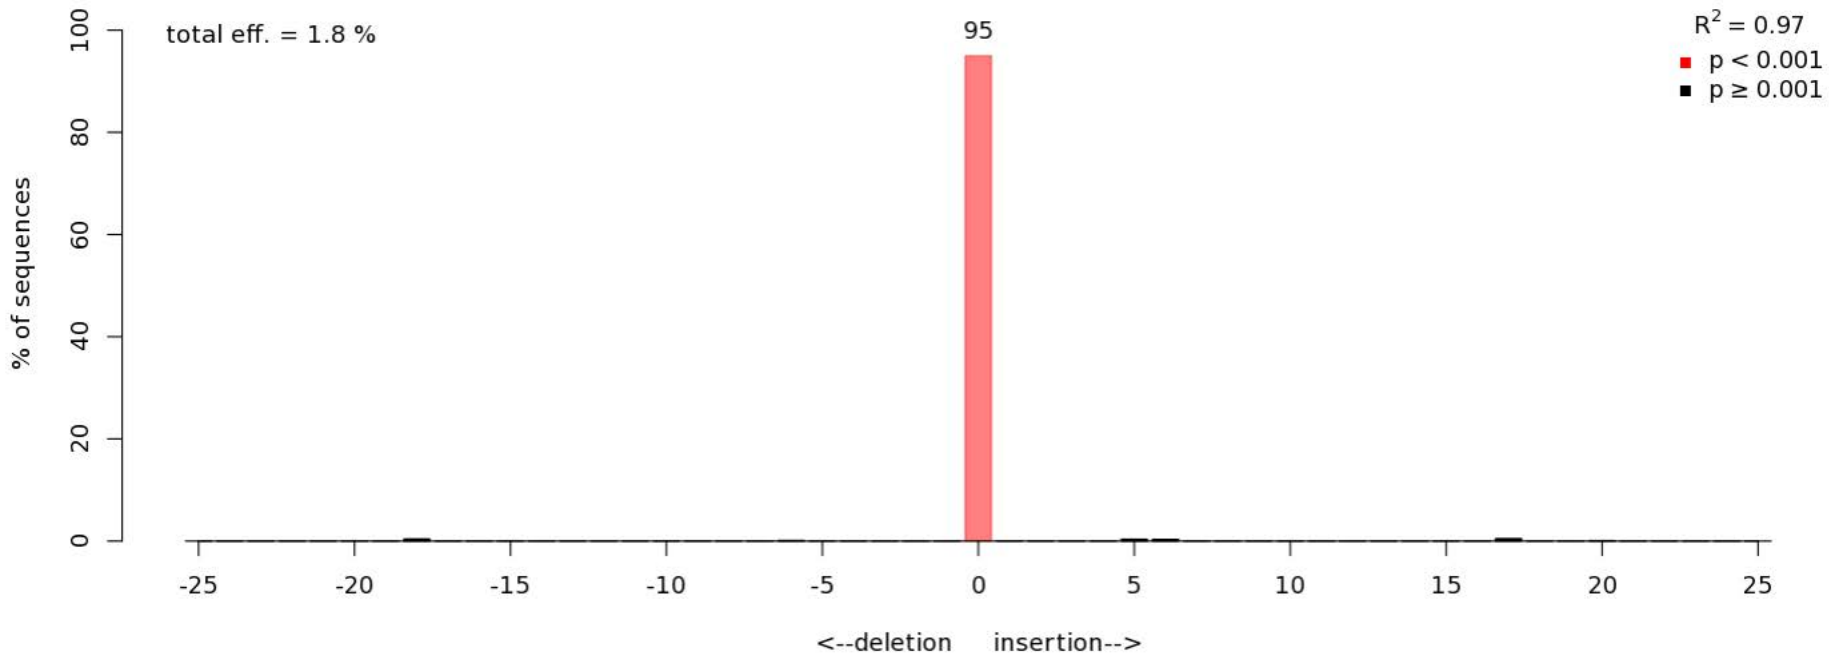

# LNP-RNP [H2O] 0% DOTAP

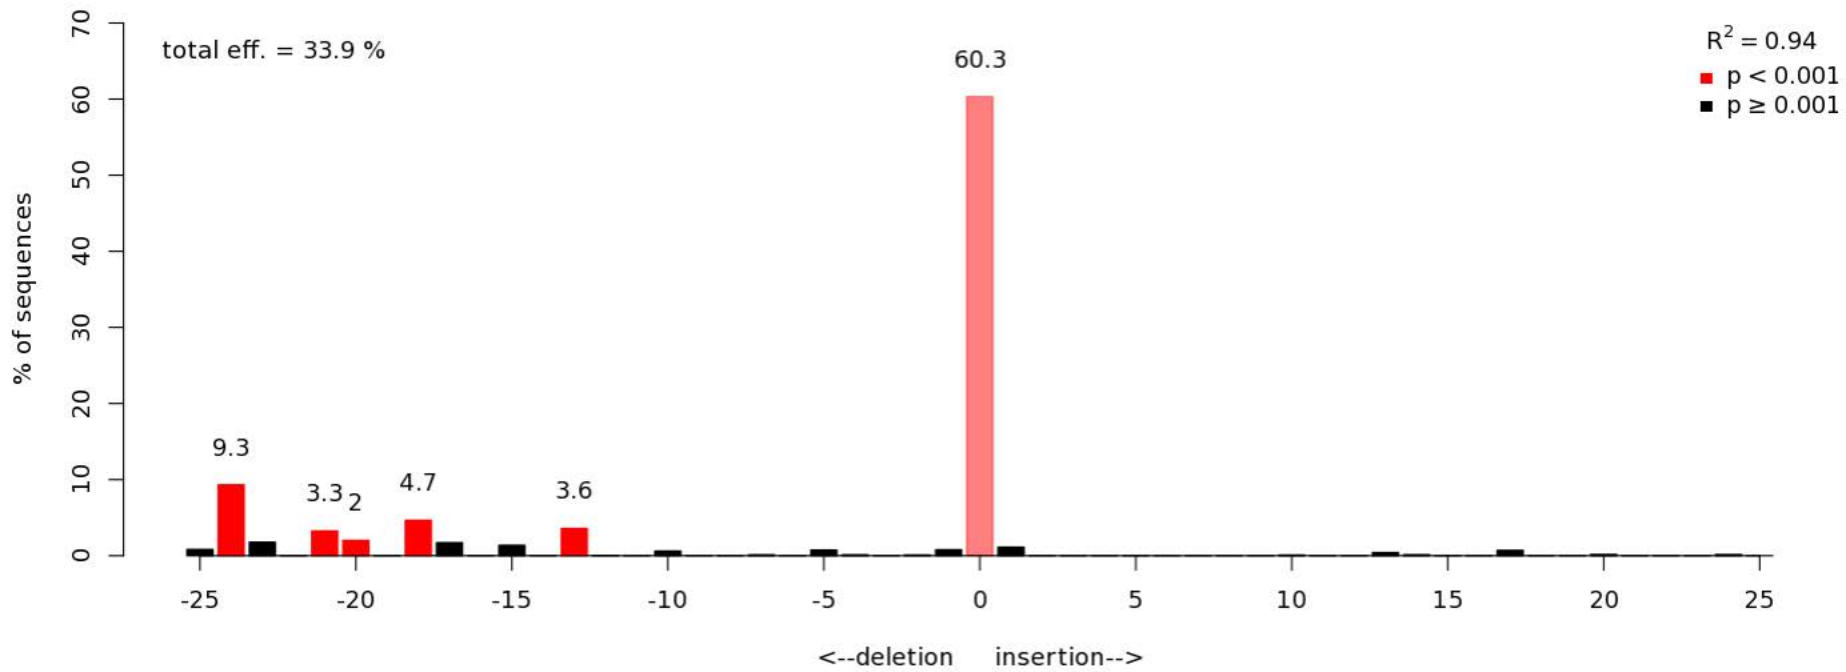

# LNP-RNP [H2O] 0,25% DOTAP

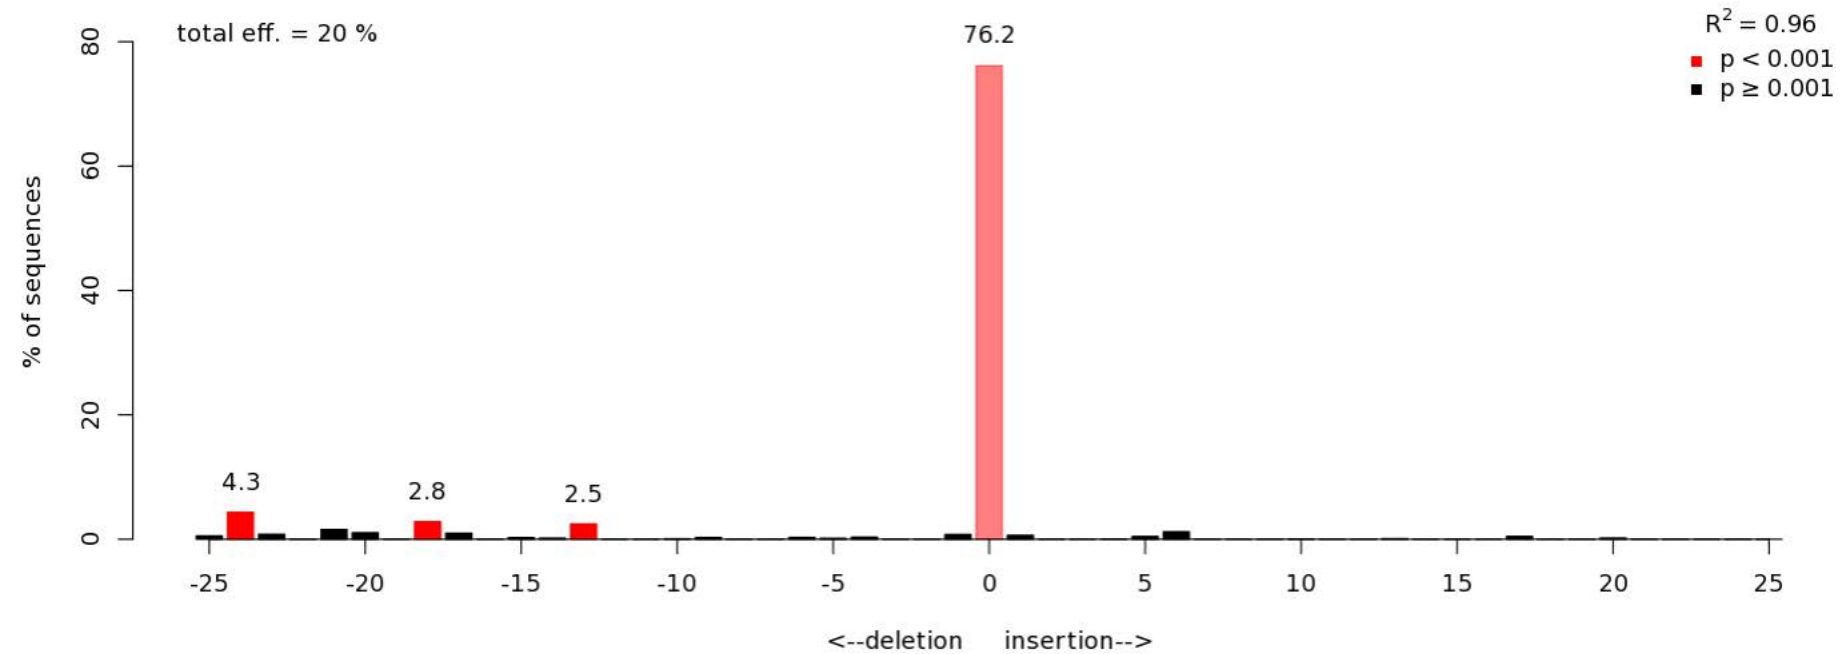

# LNP-RNP [H2O] 2% DOTAP

total eff. = 8.7 %

$R^2 = 0.96$

■  $p < 0.001$

■  $p \geq 0.001$

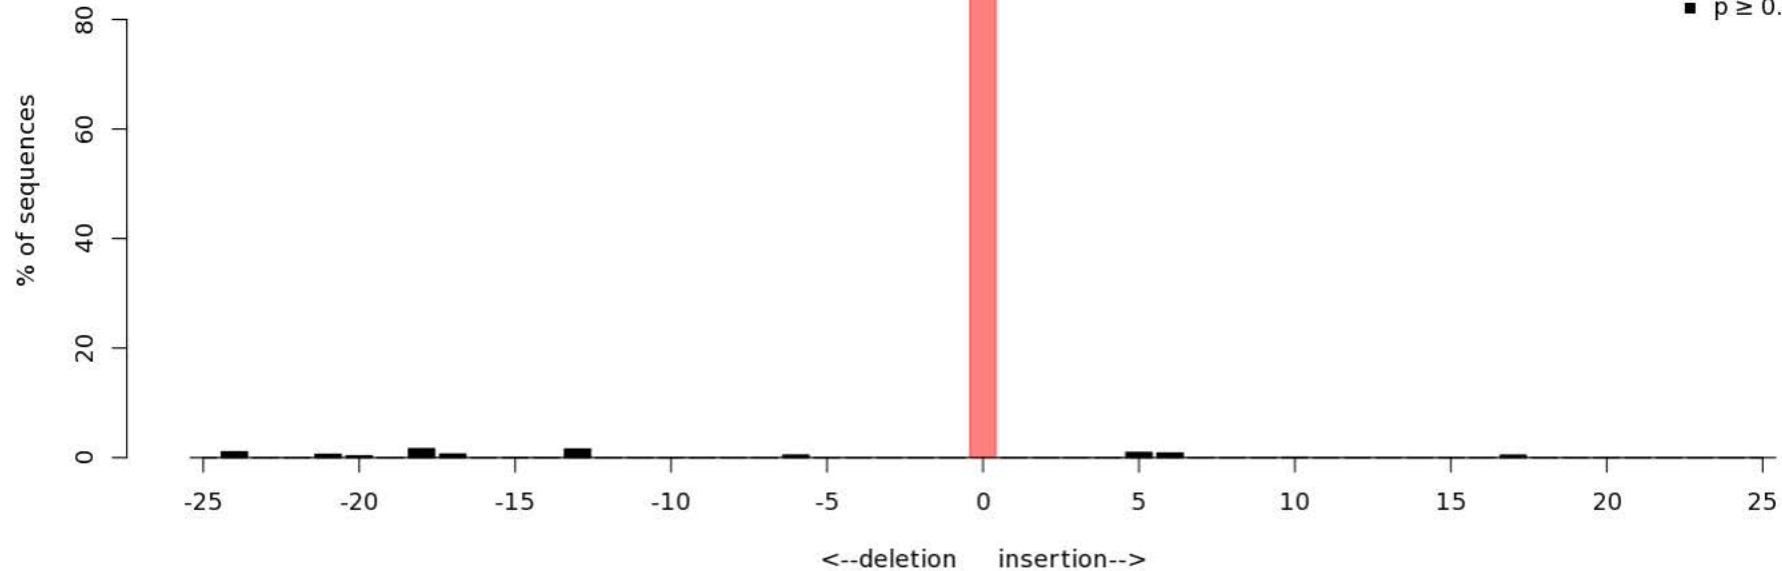

# LNP-RNP [H2O] 5% DOTAP

$R^2 = 0.97$

■  $p < 0.001$

■  $p \geq 0.001$

total eff. = 16.6 %

% of sequences

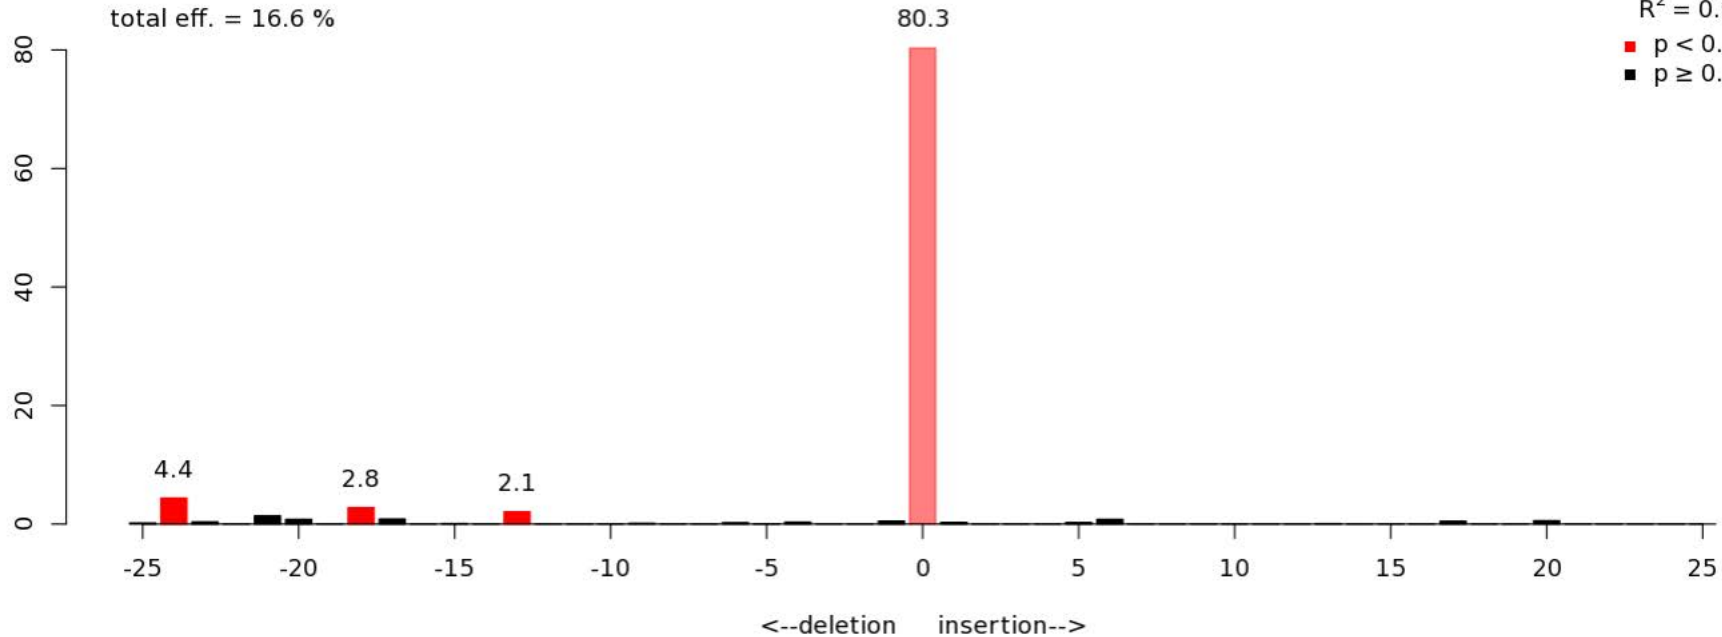

# LNP-RNP [HEPES] 0% DOTAP

$R^2 = 0.83$

■  $p < 0.001$

■  $p \geq 0.001$

total eff. = 23.5 %

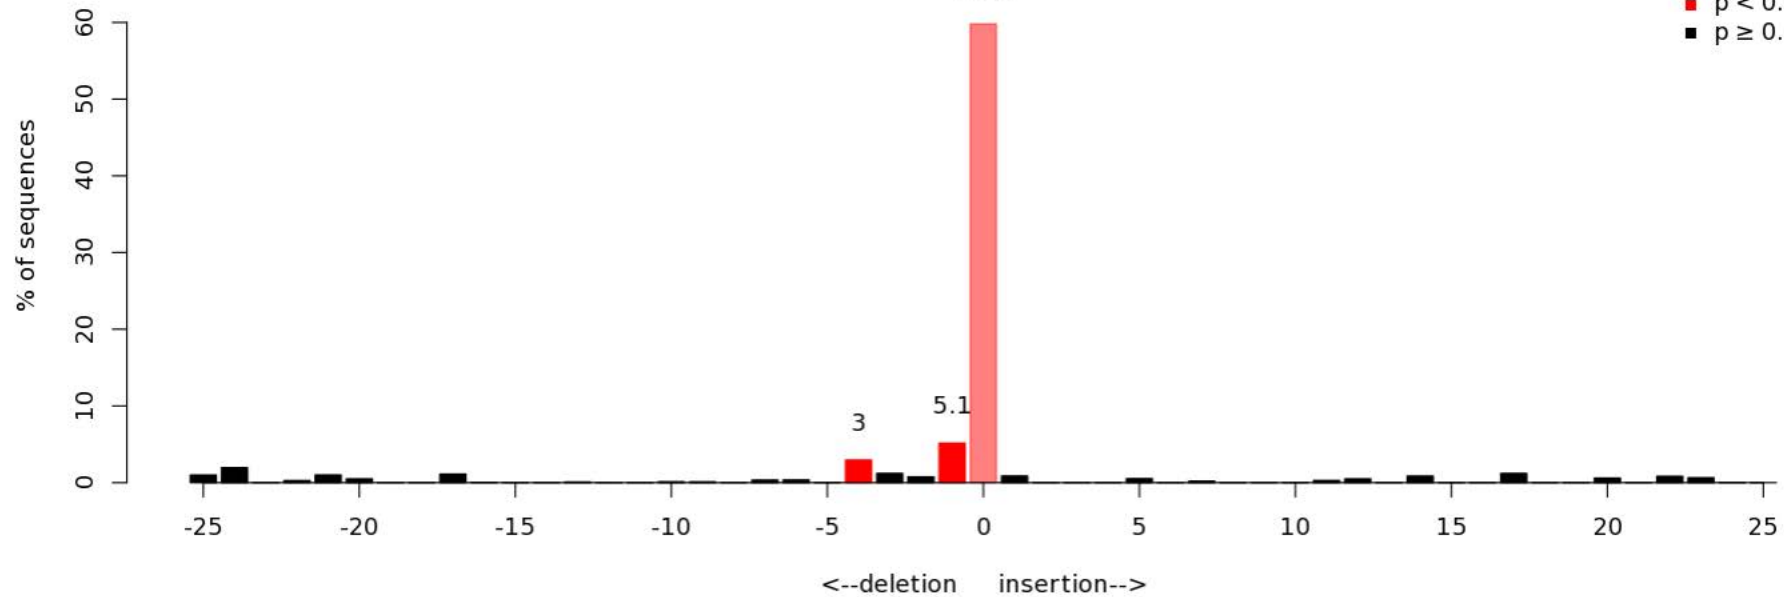

# LNP-RNP [HEPES] 0,25% DOTAP

total eff. = 13.8 %

$R^2 = 0.97$

■  $p < 0.001$

■  $p \geq 0.001$

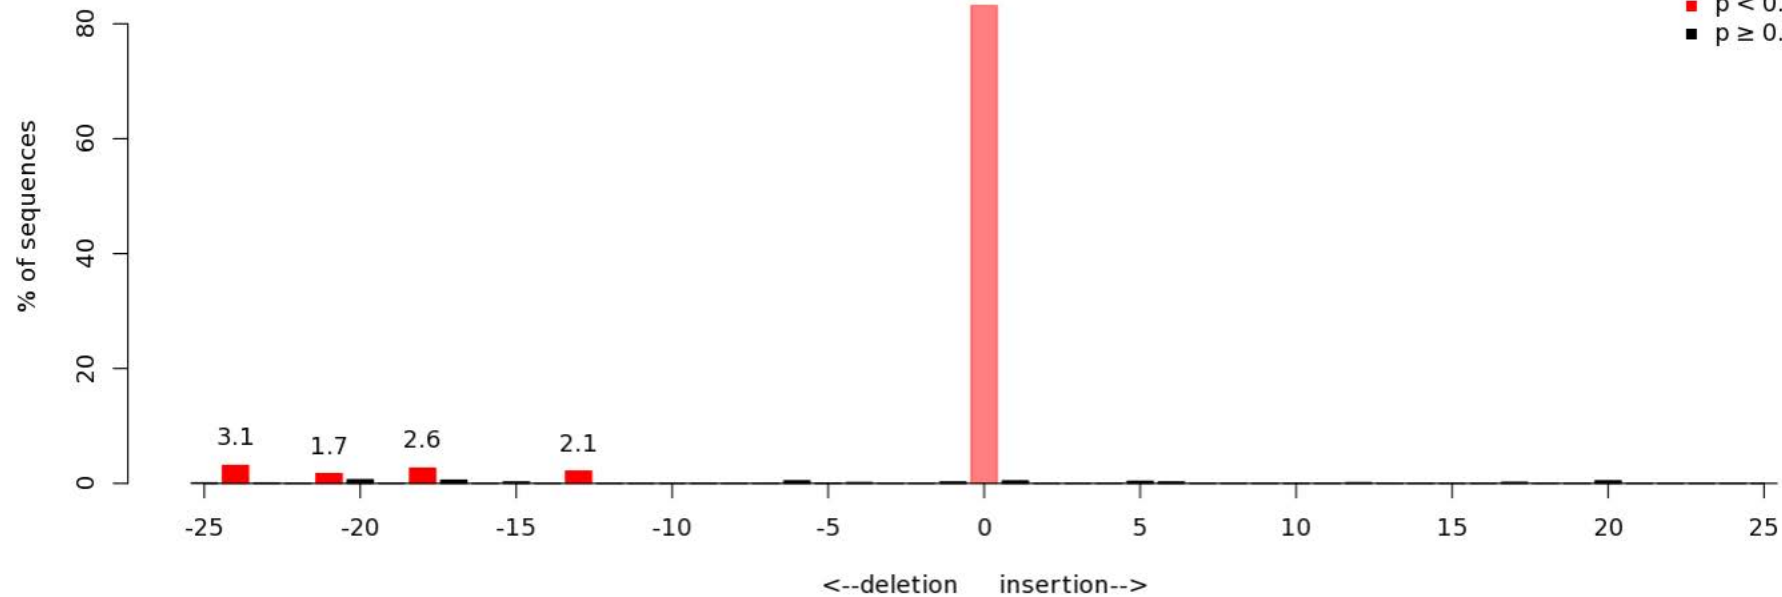

# LNP-RNP [HEPES] 2% DOTAP

total eff. = 8.3 %

$R^2 = 0.97$

■  $p < 0.001$

■  $p \geq 0.001$

% of sequences

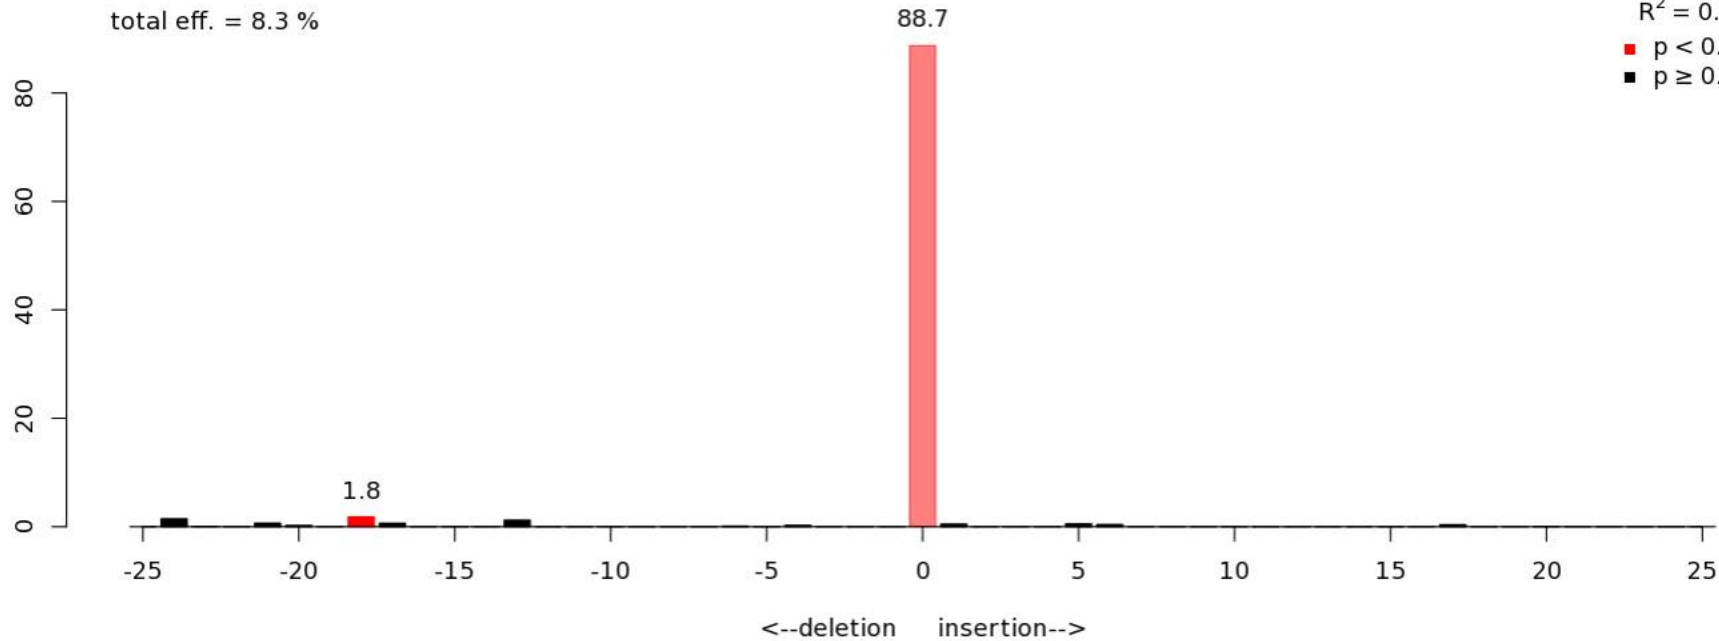



# LNP-RNP [HEPES] 5% DOTAP

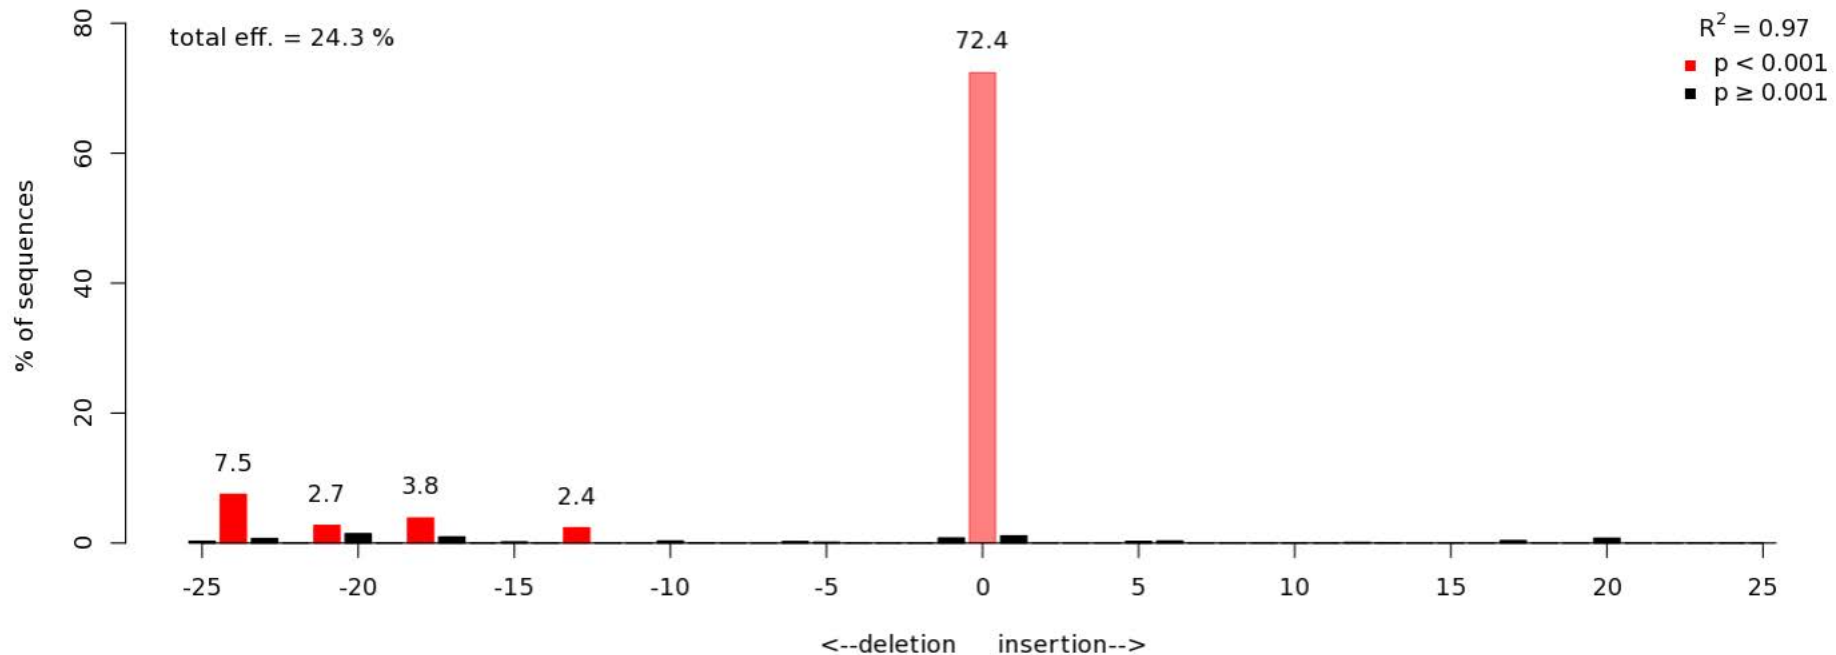

# LNP-RNP [PBS]

$R^2 = 0.97$

■  $p < 0.001$

■  $p \geq 0.001$

total eff. = 1.3 %

95.8

% of sequences

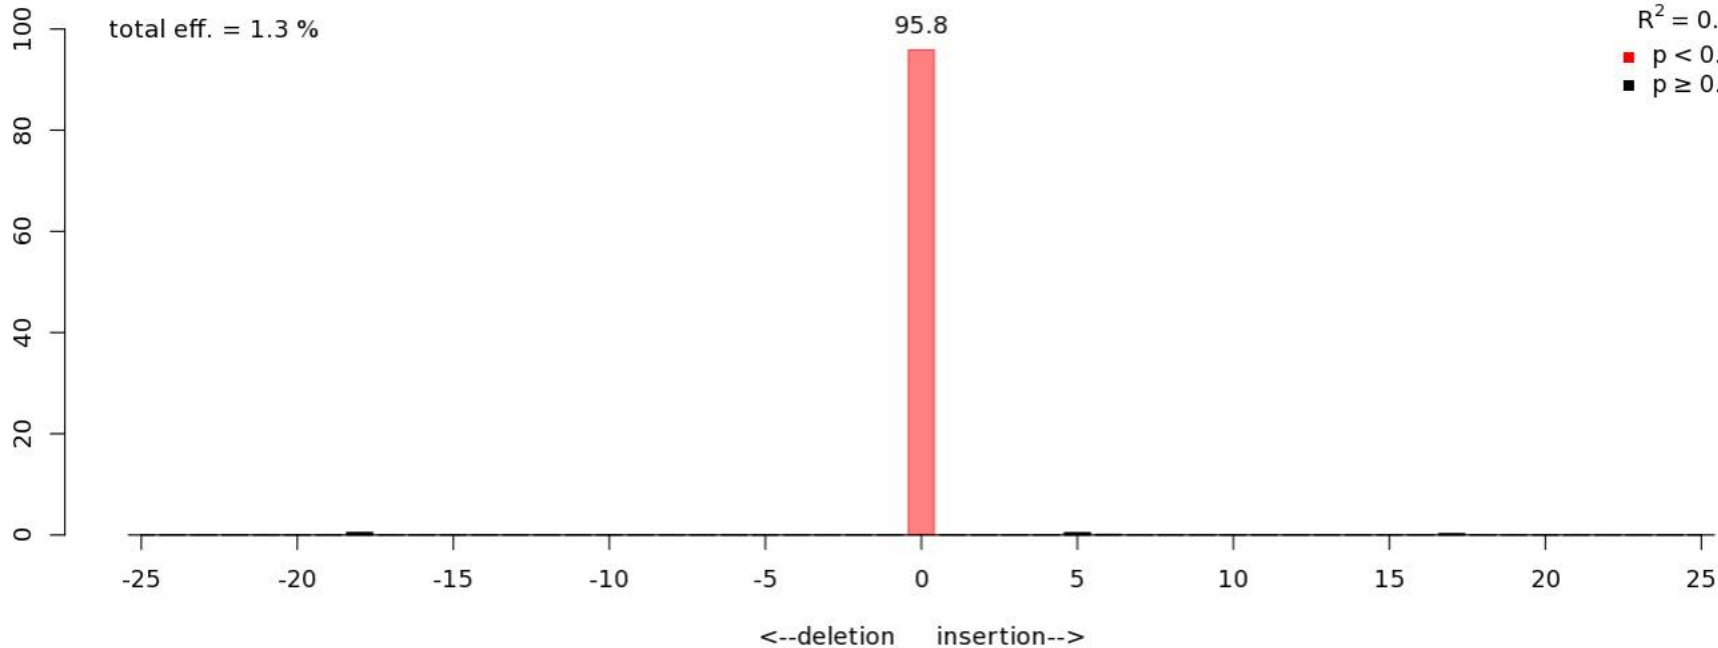

## ProDeliverin RNP

$R^2 = 0.97$

■  $p < 0.001$

■  $p \geq 0.001$

total eff. = 27.7 %

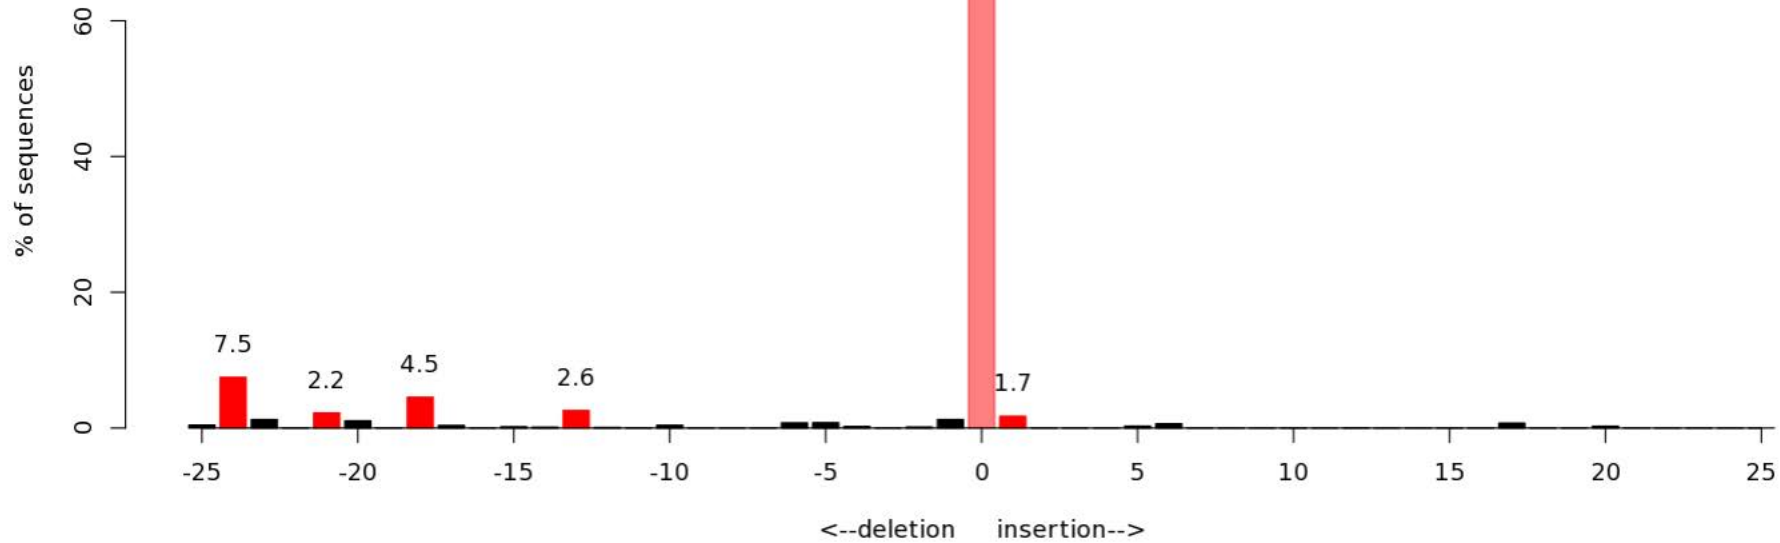

Supplement: Supplementary file 1 [file supplementary]
